# Supplementary material
Source: publisher figshare collection journal article supplement (https://springernature.figshare.com/ndownloader/files/15135776)
Supplement: Supplementary file 1 [file 15135776]

id	First Author	Year	Ecotype	Priming agent	Biotic stress	Nr of times repeated	nT	nC	m1T	m1C	sd1T	sd1C	g	var.g	Priming_class_Broad	Triggering_class_broad
169	Gupta V.	2000	Col	SA	Psm ES4326	4	8	8	5.843	6.556	0.276	0.308	-2.31	0.39	Hormone	Bacteria
169	Gupta V.	2000	Col	SA	Psm ES4326	4	8	8	4.265	5.362	0.254	0.5665	-2.36	0.40	Hormone	Bacteria
173	Schreiber K.	2008	Col	(Sdiz) Sulfadiazine	DC3000	NA	5	5	5.166	6.022	0.5595	0.24	-1.80	0.49	Chemical	Bacteria
173	Schreiber K.	2008	Col	(Smex) Sulfamethoxazole	DC3000	NA	5	5	4.461	6.022	0.6375	0.24	-2.93	0.75	Chemical	Bacteria
173	Schreiber K.	2008	Col	(Snil) Sulfanilamide	DC3000	NA	5	5	5.893	6.022	0.098	0.24	-0.64	0.35	Chemical	Bacteria
173	Schreiber K.	2008	Col	(Spyr) Sulfapyridine	DC3000	NA	5	5	5.471	6.022	0.264	0.24	-1.97	0.52	Chemical	Bacteria
173	Schreiber K.	2008	Col	flg22	DC3000	NA	7	7	4.497	5.637	0.0725	0.181	-7.74	2.39	Chemical	Bacteria
173	Schreiber K.	2008	Col	SA	DC3000	2	6	6	4.149	5.434	0.265	0.204	-5.02	1.33	Hormone	Bacteria
1	Suarez	2013	Col-0	Pectimorf (an OG)	B. Cinerea	2	10	10	5.807	11.122	4.363943171	4.737091935	-1.12	0.21	Chemical	Fungi
2	Abe H.	2008	Col-0	JA	F. occidentalis	NA	10	10	1.72	4.354	0.1265	0.2935	-11.16	3.30	Hormone	Herbivores
2	Abe H.	2008	Col-0	JA	F. occidentalis	NA	10	10	1.935	2.798	0.4475	0.259	-2.26	0.31	Hormone	Herbivores
3	Attaran E.	2008	Col-0	P. syringae pv. maculicola	P. syringae pv. maculicola	NA	7	7	7.548	42.634	1.911	19.362	-2.39	0.45	Bacteria	Bacteria
5	Canet J. V.	2010	Col-0	BTH	DC3000	3	15	15	2.787	5.567	0.1205	0.1115	-23.30	9.17	Chemical	Bacteria
6	Davidsson P.	2017	Col-0	long-OG mix	Pectobacterium carotovorum sp. carotovorum SCC1	2	12	12	6250000	8437081.762	1043404.102	1391205.467	-1.72	0.22	Chemical	Bacteria
6	Davidsson P.	2017	Col-0	Trimers	Pectobacterium carotovorum sp. carotovorum SCC1	2	12	12	5851740.703	8437081.762	901385.9173	1391205.467	-2.13	0.25	Chemical	Bacteria
7	Dellagi A.	2009	Col-0	Chrysobactin (CB)	E. chrysanthemi	NA	6	6	4897788.194	787045.7897	3137473.028	385149.5763	1.70	0.40	Chemical	Bacteria
8	Deng B.	2011	Col-0	Riboflavin	DC3000	3	30	30	4.044	5.702	0.507	0.5215	-3.18	0.15	Vitamin	Bacteria
10	Elsharkawy M. M.	2012	Col-0	BTH	Cucumber mosaic virus	NA	10	10	3.787	6.777	1.239612843	1.843607876	-1.82	0.27	Chemical	Virus
10	Elsharkawy M. M.	2012	Col-0	BTH	Cucumber mosaic virus	NA	10	10	4.187	6.97	1.331318895	1.268073342	-2.05	0.29	Chemical	Virus
10	Elsharkawy M. M.	2012	Col-0	Penicillium simplicissimum GP17-2	Cucumber mosaic virus	NA	10	10	4.029	6.777	1.372428505	1.843607876	-1.62	0.25	Fungi	Virus
10	Elsharkawy M. M.	2012	Col-0	Penicillium simplicissimum GP17-2	Cucumber mosaic virus	NA	10	10	3.988	6.97	1.815147377	1.268073342	-1.82	0.27	Fungi	Virus
11	Elsharkawy M. M.	2013	Col-0	Trichoderma asperellum SKT-1	Cucumber mosaic virus	NA	10	10	3.189	7.059	0.651429198	0.774758027	-5.18	0.85	Fungi	Virus
11	Elsharkawy M. M.	2013	Col-0	Trichoderma asperellum SKT-1	Cucumber mosaic virus	NA	10	10	2.609	7.02	0.664078309	0.698863363	-6.20	1.14	Fungi	Virus
12	Jiang C. H.	2016	Col-0	Bacillus cereus AR156	DC3000	3	24	24	5.109	6.684	0.1255	0.1335	-11.96	1.57	Bacteria	Bacteria
12	Jiang C. H.	2016	Col-0	Bacillus cereus AR156	DC3000	3	24	24	5.12	6.666	0.053	0.124	-15.95	2.73	Bacteria	Bacteria
13	Kawamura Y.	2009	Col-0	CWP (Cell wall protein from P. Oligandrum)	Ralstonia solanacearum	3	3	3	98.988	782.58	61.05132687	40.63737605	-10.55	9.69	Chemical	Bacteria
13	Kawamura Y.	2009	Col-0	CWP (Cell wall protein from P. Oligandrum)	Ralstonia solanacearum	3	3	3	93.34	784.668	56.54193259	38.35799718	-11.45	11.35	Chemical	Bacteria
13	Kawamura Y.	2009	Col-0	CWP (Cell wall protein from P. Oligandrum)	DC3000	3	3	3	150.873	636.387	10.73092078	72.43349875	-7.50	5.12	Chemical	Bacteria
13	Kawamura Y.	2009	Col-0	CWP (Cell wall protein from P. Oligandrum)	DC3000	3	3	3	221.484	736.187	29.08632921	60.0502015	-8.73	6.77	Chemical	Bacteria
14	Lakshmanan V.	2013	Col-0	Bacillus subtilis strain FB17	DC3000	NA	24	24	8.752	10.16	0.275	0.4	-4.03	0.25	Bacteria	Bacteria
14	Lakshmanan V.	2013	Col-0	Bacillus subtilis strain FB17	DC3000	NA	24	24	8.738	10.166	0.28	0.3915	-4.13	0.26	Bacteria	Bacteria
16	Narusaka Y.	2009	Col-0	Abietic acid	C. higginsianum	3	10	10	1.365	5.041	0.5945082	0.550236313	-6.15	1.13	Chemical	Fungi
16	Narusaka Y.	2009	Col-0	Allose	C. higginsianum	3	10	10	4.405	5.041	0.771595749	0.550236313	-0.91	0.20	Chemical	Fungi
16	Narusaka Y.	2009	Col-0	Glycine	C. higginsianum	3	10	10	3.77	5.041	0.806380803	0.550236313	-1.76	0.26	Chemical	Fungi
16	Narusaka Y.	2009	Col-0	Thymol	C. higginsianum	3	10	10	4.176	5.041	1.236450565	0.550236313	-0.87	0.20	Chemical	Fungi
17	Noh S. W.	2017	Col-0	Cyclo(Gly-L-Pro)	Pseudomo- nas syringae pv. maculicola	3	8	8	1000000	3715352.291	1952861.86	2751441.666	-1.08	0.26	Chemical	Bacteria
17	Noh S. W.	2017	Col-0	Cyclo(Gly-L-Pro)	Pseudomo- nas syringae pv. maculicola	3	8	8	103752.8416	669884.6094	129742	377995.2798	-1.89	0.34	Chemical	Bacteria
17	Noh S. W.	2017	Col-0	Cyclo(L-Ala-L-Leu)	Pseudomo- nas syringae pv. maculicola	3	8	8	16904.40932	3715352.291	14351.97496	2751441.666	-1.80	0.32	Chemical	Bacteria
17	Noh S. W.	2017	Col-0	Cyclo(L-Ala-L-Leu)	Pseudomo- nas syringae pv. maculicola	3	8	8	24945.94727	669884.6094	17252.41158	377995.2798	-2.28	0.39	Chemical	Bacteria
17	Noh S. W.	2017	Col-0	Cyclo(L-Ala-L-lle)	Pseudomo- nas syringae pv. maculicola	3	8	8	64565.4229	3715352.291	76527.69519	2751441.666	-1.77	0.32	Chemical	Bacteria
17	Noh S. W.	2017	Col-0	Cyclo(L-Ala-L-lle)	Pseudomo- nas syringae pv. maculicola	3	8	8	115611.2242	669884.6094	96201.42899	377995.2798	-1.90	0.34	Chemical	Bacteria
17	Noh S. W.	2017	Col-0	Cyclo(L-Leu-L-Pro)	Pseudomo- nas syringae pv. maculicola	3	8	8	575439.9373	3715352.291	818908.7962	2751441.666	-1.46	0.29	Chemical	Bacteria
17	Noh S. W.	2017	Col-0	Cyclo(L-Leu-L-Pro)	Pseudomo- nas syringae pv. maculicola	3	8	8	48305.8802	669884.6094	45988.93161	377995.2798	-2.18	0.37	Chemical	Bacteria
18	Subramanian S.	2011	Col-0	ANE (A.nodosum extract)	Sclerotinia sclerotiorum	2	15	15	4.079	6.681	3.144862477	4.790880399	-0.62	0.13	Chemical	Bacteria
18	Subramanian S.	2011	Col-0	ANE (A.nodosum extract)	DC3000	3	5	5	44.213	56.049	3.278075655	3.313852743	-3.24	0.85	Chemical	Bacteria
18	Subramanian S.	2011	Col-0	C-ANE = chloroform (A.nodosum extract)	DC3000	3	5	5	33.349	56.049	8.246618701	3.313852743	-3.26	0.86	Chemical	Bacteria
18	Subramanian S.	2011	Col-0	E-ANE = ethylacetate fractions (A.nodosum extract)	DC3000	3	5	5	31.111	56.049	7.177778208	3.313852743	-4.03	1.14	Chemical	Bacteria
21	Yasuda M.	2008	Col-0	12-benzisothiazol-3(2H)-one11-dioxide (BIT)	DC3000	3	6	6	386366.9771	7177942.913	177270.6787	1632545.817	-5.40	1.50	Chemical	Bacteria
21	Yasuda M.	2008	Col-0	BTH	DC3000	3	6	6	173380.3998	7177942.913	147985.6541	1632545.817	-5.58	1.58	Chemical	Bacteria
22	Zahid A.	2017	Col-0	Ergosterol	DC3000	3	6	6	123219.23	92946.058	133188.8762	112818.8215	0.23	0.29	Chemical	Bacteria
22	Zahid A.	2017	Col-0	flg22	DC3000	3	6	6	17444.671	92946.058	21259.42276	112818.8215	-0.86	0.31	Chemical	Bacteria
22	Zahid A.	2017	Col-0	holaphyllamine (HPA)	DC3000	3	6	6	4114.783	92946.058	3165.659306	112818.8215	-1.03	0.33	Chemical	Bacteria
23	Zhou J.	2013	Col-0	Thiamine	Sclerotinia	3	10	10	20.094	37.384	7.046	4.253	-2.85	0.39	Vitamin	Fungi
23	Zhou J.	2013	Col-0	Thiamine	Sclerotinia	NA	10	10	82.59	144.714	12.4	23.247	-3.19	0.44	Vitamin	Fungi
23	Zhou J.	2013	Col-0	Thiamine	Sclerotinia	NA	10	10	52.951	91.391	7.25	13.881	-3.32	0.46	Vitamin	Fungi
23	Zhou J.	2013	Col-0	Thiamine	Sclerotinia	NA	10	10	34.425	74.45	5.587	6.95	-6.08	1.11	Vitamin	Fungi
24	Edgar C. I.	2006	Col-0	MeJA	Fusarium oxysporum	2	3	3	73.683	77.518	6.620764212	2.146876976	-0.62	0.46	Hormone	Fungi
24	Edgar C. I.	2006	Col-0	MeJA	Fusarium oxysporum	2	3	3	9.95	5.522	8.821334763	4.427121864	0.51	0.45	Hormone	Fungi
24	Edgar C. I.	2006	Col-0	SA	Fusarium oxysporum	2	3	3	40.07	81.418	26.64933373	6.632022542	-1.70	0.67	Hormone	Fungi
24	Edgar C. I.	2006	Col-0	SA	Fusarium oxysporum	2	3	3	3.544	8.985	0.928379233	1.8238495	-3.01	1.18	Hormone	Fungi
25	Ferrari S.	2007	Col-0	flg22	B. cinerea	NA	12	12	10.155	15.427	4.690393587	6.124531656	-0.93	0.17	Chemical	Fungi
25	Ferrari S.	2007	Col-0	flg22	B. cinerea	NA	12	12	4.428	6.737	1.191650956	1.735514909	-1.50	0.20	Chemical	Fungi
25	Ferrari S.	2007	Col-0	OG	B. cinerea	NA	12	12	8.085	13.171	1.648912369	8.331164384	-0.82	0.17	Chemical	Fungi
25	Ferrari S.	2007	Col-0	OG	B. cinerea	NA	12	12	6.619	10.518	4.399409051	4.437514169	-0.85	0.17	Chemical	Fungi
25	Ferrari S.	2007	Col-0	OG	B. cinerea	NA	12	12	13.386	19.213	5.455960044	6.543687951	-0.93	0.17	Chemical	Fungi
25	Ferrari S.	2007	Col-0	OG	B. cinerea	NA	12	12	14.013	42.713	13.94127695	34.67912127	-1.05	0.18	Chemical	Fungi
25	Ferrari S.	2007	Col-0	OG	B. cinerea	NA	12	12	7.777	18.356	2.733176174	9.557456356	-1.45	0.20	Chemical	Fungi
25	Ferrari S.	2007	Col-0	OG	B. cinerea	NA	12	12	2.475	6.569	2.7886018	2.25166605	-1.56	0.21	Chemical	Fungi
27	Mishina T. E.	2007	Col-0	DC3000 (Pst)	P. syringae pv. Maculicola (Psm)	2	5	5	1.258	22.252	1.717	6.352	-4.08	1.16	Bacteria	Bacteria
27	Mishina T. E.	2007	Col-0	DC3000 (Pst)	P. syringae pv. Maculicola (Psm)	2	5	5	1.186	22.316	1.187	6.272	-4.23	1.22	Bacteria	Bacteria
27	Mishina T. E.	2007	Col-0	flg22	P. syringae pv. Maculicola (Psm)	2	5	5	4.633	24.949	1.569	6.419	-3.93	1.10	Chemical	Bacteria
27	Mishina T. E.	2007	Col-0	flg22	P. syringae pv. Maculicola (Psm)	2	5	5	3.493	15.031	2.155	1.466	-5.65	1.93	Chemical	Bacteria
27	Mishina T. E.	2007	Col-0	LPS (e.coli)	P. syringae pv. Maculicola (Psm)	2	5	5	5.045	9.782	2.211	3.106	-1.59	0.45	Chemical	Bacteria
27	Mishina T. E.	2007	Col-0	LPS (p. Aeruginosa)	P. syringae pv. Maculicola (Psm)	2	5	5	3.473	9.782	1.034	3.106	-2.46	0.63	Chemical	Bacteria
27	Mishina T. E.	2007	Col-0	Psg	P. syringae pv. Maculicola (Psm)	2	5	5	7.092	22.252	1.583	6.352	-2.96	0.76	Bacteria	Bacteria
27	Mishina T. E.	2007	Col-0	Psg	P. syringae pv. Maculicola (Psm)	2	5	5	7.119	22.316	1.579	6.272	-3.00	0.78	Bacteria	Bacteria
27	Mishina T. E.	2007	Col-0	Psm	P. syringae pv. Maculicola (Psm)	2	5	5	0.652	15.031	0.362	1.466	-12.16	7.72	Bacteria	Bacteria
27	Mishina T. E.	2007	Col-0	Psm	P. syringae pv. Maculicola (Psm)	2	5	5	0.435	6.5	0.238	2.261	-3.41	0.91	Bacteria	Bacteria
27	Mishina T. E.	2007	Col-0	Psm	P. syringae pv. Maculicola (Psm)	2	5	5	0.898	9.782	0.54	3.106	-3.60	0.97	Bacteria	Bacteria
27	Mishina T. E.	2007	Col-0	Psm (killed)	P. syringae pv. Maculicola (Psm)	2	5	5	4.386	20.217	1.461	12.452	-1.61	0.46	Bacteria	Bacteria
27	Mishina T. E.	2007	Col-0	Psp	P. syringae pv. Maculicola (Psm)	2	5	5	5.595	22.316	3.727	6.272	-2.93	0.75	Bacteria	Bacteria
28	Kishimoto K.	2005	Col-0	(E)-2-Hexenal	B. cinerea	NA	3	3	49.98	79.488	23.93434408	11.67315642	-1.25	0.56	Chemical	Fungi
28	Kishimoto K.	2005	Col-0	(E)-2-Hexenal	B. cinerea	NA	3	3	7	29	1	3.5	-6.84	4.32	Chemical	Fungi
28	Kishimoto K.	2005	Col-0	(Z)-3-Hexenal	B. cinerea	NA	3	3	62.953	79.488	15.16410482	11.67315642	-0.98	0.51	Chemical	Fungi
28	Kishimoto K.	2005	Col-0	(Z)-3-Hexenal	B. cinerea	NA	3	3	7	29	2	3.5	-6.17	3.60	Chemical	Fungi
28	Kishimoto K.	2005	Col-0	Allo-ocimene	B. cinerea	NA	3	3	60.079	79.488	12.25772357	11.67315642	-1.30	0.57	Chemical	Fungi
28	Kishimoto K.	2005	Col-0	Allo-ocimene	B. cinerea	NA	3	3	6	29	1.5	3.5	-6.83	4.32	Chemical	Fungi
30	Pieterse C. M. J.	2000	Col-0	WCS358r	DC3000	2	20	20	67.539	101.422	31.47936499	59.03531696	-0.70	0.10	Bacteria	Bacteria
30	Pieterse C. M. J.	2000	Col-0	WCS374r	DC3000	2	20	20	101.431	101.422	25.21390251	59.03531696	0.00	0.10	Bacteria	Bacteria
30	Pieterse C. M. J.	2000	Col-0	WCS417r	DC3000	2	20	20	58.824	101.422	28.37570263	59.03531696	-0.90	0.11	Bacteria	Bacteria
30	Pieterse C. M. J.	2000	Col-0	WCS417r	DC3000	2	20	20	50.19	100.366	22.47695531	52.5659324	-1.22	0.11	Bacteria	Bacteria
30	Pieterse C. M. J.	2000	Col-0	WCS417r	DC3000	2	20	20	60.353	100.235	18.93949577	31.80730784	-1.49	0.12	Bacteria	Bacteria
30	Pieterse C. M. J.	2000	Col-0	WCS417r	DC3000	2	20	20	54.364	100.235	17.31163828	31.80730784	-1.76	0.13	Bacteria	Bacteria
31	Raacke I. C.	2006	Col-0	Yeast	DC3000	3	5	5	5.832	6.503	0.188	0.1405	-3.65	0.99	Fungi	Bacteria
31	Raacke I. C.	2006	Col-0	Yeast	DC3000	NA	5	5	5.634	6.456	0.1005	0.055	-9.16	4.53	Fungi	Bacteria
32	Thomma B. P. H. J.	2000	Col-0	INA	P. Cucumerina	NA	10	10	1.693	2.469	0.433232039	0.531262647	-1.53	0.24	Chemical	Fungi
32	Thomma B. P. H. J.	2000	Col-0	MeJA	P. Cucumerina	NA	10	10	1.533	2.673	0.417420651	0.643523504	-2.01	0.28	Hormone	Fungi
32	Thomma B. P. H. J.	2000	Col-0	MeJA	P. Cucumerina	NA	10	10	1.461	2.551	0.466435955	0.450624567	-2.28	0.31	Hormone	Fungi
32	Thomma B. P. H. J.	2000	Col-0	MeJA	P. Cucumerina	NA	10	10	1.449	2.557	0.450624567	0.479085066	-2.28	0.31	Hormone	Fungi
32	Thomma B. P. H. J.	2000	Col-0	MeJA	Alternaria brassicicola	NA	10	10	0.65	2.111	0.398446985	0.431650901	-3.37	0.47	Hormone	Fungi
33	Tjamos S. E.	2005	Col-0	Paenibacillus alvei K165	Verticillium dahliae	3	15	15	35.695	73.752	8.051932377	17.07211059	-2.77	0.25	Bacteria	Fungi
34	Zhou N.	1998	Col-0	SA	P. s. maculicola ES4326	3	8	8	5.778	6.656	0.494	0.617	-1.49	0.29	Hormone	Bacteria
35	De Vos M.	2009	Col-0	Aphid (Myzus persicae) feeding	Myzus persicae	NA	15	15	12.367	13.404	2.945403835	3.826507546	-0.30	0.13	Herbivores	Herbivores
35	De Vos M.	2009	Col-0	Aphid (Myzus persicae) feeding	Myzus persicae	NA	20	20	3.201	5.15	2.549117494	3.023163906	-0.68	0.10	Herbivores	Herbivores
35	De Vos M.	2009	Col-0	Aphid (Myzus persicae) feeding	Myzus persicae	NA	16	16	59.754	100.328	18.278	27.484	-1.69	0.16	Herbivores	Herbivores
35	De Vos M.	2009	Col-0	Aphid (Myzus persicae) feeding	Myzus persicae	NA	20	20	6.012	4.968	3.953368184	3.108134489	0.29	0.10	Herbivores	Herbivores
35	De Vos M.	2009	Col-0	Aphid saliva (Myzus persicae)	Myzus persicae	NA	16	16	15.474	19.221	4.116	3.696	-0.93	0.13	Herbivores	Herbivores
36	Ahn I-P	2007	Col-0	Thiamine	DC3000	NA	5	5	2.053	8.309	0.487462819	0.377895488	-12.96	8.72	Vitamin	Bacteria
36	Ahn I-P.	2007	Col-0	Thiamine	DC3000	NA	5	5	5.457	8.213	2.02364152	3.011983566	-0.97	0.37	Vitamin	Bacteria
36	Ahn I-P.	2007	Col-0	Thiamine	DC3000	3	5	5	3.915	8.495	0.948092822	1.413194962	-3.44	0.92	Vitamin	Bacteria
37	Ahn I-P	2007	Col-0	BTH	DC3000	3	25	25	35.677	89.032	61.29	105.485	-0.61	0.08	Chemical	Bacteria
37	Ahn I-P	2007	Col-0	Pseudomonas putida	DC3000	3	25	25	33.903	89.032	51.615	105.485	-0.65	0.08	Bacteria	Bacteria
37	Ahn I-P.	2007	Col-0	Pseudomonas putida	DC3000	NA	20	20	31.793	82.043	19.44484713	23.08963794	-2.31	0.16	Bacteria	Bacteria
37	Ahn I-P.	2007	Col-0	Pseudomonas putida	DC3000	NA	5	5	3.783	6.867	1.399778554	0.538892383	-2.63	0.67	Bacteria	Bacteria
39	Cartieaux F.	2008	Col-0	Bradyrhizobium sp. strain ORS278	DC3000	3	30	30	9.185	10.054	1.632213221	1.254284657	-0.59	0.07	Bacteria	Bacteria
40	Cordovez V.	2017	Col-0	R. solani VOCs	M. brassicae	NA	8	8	2.064	1.213	1.046518036	1.179454111	0.72	0.24	Chemical	Herbivores
41	De Vos M.	2006	Col-0	P. Rapae	P.rapae (1st)	NA	20	20	79.032	121.505	53.0484767	55.30243322	-0.77	0.10	Herbivores	Herbivores
41	De Vos M.	2006	Col-0	P.rapae	DC3000	NA	20	20	49.761	99.88	25.2988731	17.10592003	-2.27	0.16	Herbivores	Bacteria
41	De Vos M.	2006	Col-0	P.rapae (local leaves)	DC3000	NA	20	20	66.912	100.129	24.6772462	14.07828399	-1.62	0.13	Herbivores	Bacteria
42	Gamir J.	2014	Col-0	BABA	P. cucumerina spore	3	25	25	3.826	5.481	0.259	0.211	-6.90	0.55	Chemical	Fungi
42	Gamir J.	2014	Col-0	galacturonic acid	P. cucumerina spore	3	25	25	5.385	5.481	0.2125	0.211	-0.45	0.08	Chemical	Fungi
42	Gamir J.	2014	Col-0	hypoxanthine	P. cucumerina spore	3	25	25	4.172	5	0.134	0.183	-5.08	0.34	Chemical	Fungi
42	Gamir J.	2014	Col-0	I3CA	P. cucumerina spore	3	25	25	3.519	5.481	0.173	0.211	-10.01	1.08	Chemical	Fungi
45	Kravchuk Z.	2011	Col-0	HxAc	B. cinerea	NA	15	15	4.544	6.451	1.444622788	0.722311394	-1.62	0.17	Chemical	Fungi
45	Kravchuk Z.	2011	Col-0	HxAc	B. cinerea	NA	15	15	3.273	4.091	0.433774135	0.472503968	-1.75	0.18	Chemical	Fungi
46	Mathys J.	2012	Col-0	Trichoderma hamatum (2 _ 107 /ml)	Botrytis cinerea	12	83	83	5.776	9.453	0.887802456	0.58102255	-4.88	0.10	Fungi	Fungi
48	Niu D-D.	2011	Col-0	Bacillus cereus AR156	DC3000	3	24	24	32.614	65.441	25.9107025	27.2481239	-1.21	0.10	Bacteria	Bacteria
48	Niu D-D.	2011	Col-0	BTH	DC3000	3	24	24	35.076	65.441	23.67676785	27.2481239	-1.17	0.09	Chemical	Bacteria
48	Niu D-D.	2011	Col-0	WCS417r	DC3000	3	24	24	34.529	65.441	25.01418925	27.2481239	-1.16	0.09	Bacteria	Bacteria
48	Niu D-D.	2011	Col-0	Bacillus cereus AR156	DC3000	3	24	24	30.2	69.1	22.04540769	19.59591794	-1.83	0.12	Bacteria	Bacteria
49	Niu D.	2016	Col-0	Bacillus cereus AR156	DC3000	NA	12	12	4.928	5.681	0.24	0.3845	-2.27	0.26	Bacteria	Bacteria
49	Niu D.	2016	Col-0	Bacillus cereus AR156	DC3000	NA	12	12	5.133	5.858	0.258	0.1465	-3.34	0.39	Bacteria	Bacteria
49	Niu D.	2016	Col-0	Bacillus cereus AR156	DC3000	NA	12	12	4.905	5.671	0.2365	0.29	-2.80	0.32	Bacteria	Bacteria
50	Pangesti N.	2015	Col-0	P. fluorescens WCS417r	P. Brassicae	NA	20	20	11.279	12.39	4.387165372	5.102707125	-0.23	0.10	Bacteria	Herbivores
50	Pangesti N.	2015	Col-0	P. fluorescens WCS417r	Mamestra brassicae	NA	25	25	0.895	1.09	0.54	0.535	-0.36	0.08	Bacteria	Herbivores
50	Pangesti N.	2015	Col-0	P. fluorescens WCS417r	Mamestra brassicae	NA	20	20	13.793	24.644	16.44851604	17.30269401	-0.63	0.10	Bacteria	Herbivores
50	Pangesti N.	2015	Col-0	P. fluorescens WCS417r	Mamestra brassicae	NA	25	25	1.384	1.849	0.59	0.595	-0.77	0.08	Bacteria	Herbivores
50	Pangesti N.	2015	Col-0	P. fluorescens WCS417r	Mamestra brassicae	NA	25	25	2.119	2.746	0.54	0.54	-1.14	0.09	Bacteria	Herbivores
50	Pangesti N.	2015	Col-0	P. fluorescens WCS417r	P. Brassicae	NA	20	20	86.288	85.496	12.94236145	12.94683359	0.06	0.10	Bacteria	Herbivores
50	Pangesti N.	2015	Col-0	P. fluorescens WCS417r	Mamestra brassicae	NA	25	25	1.531	1.186	0.535	0.535	0.63	0.08	Bacteria	Herbivores
50	Pangesti N.	2015	Col-0	P. fluorescens WCS417r	Mamestra brassicae	NA	20	20	57.813	46.11	13.97542486	14.99507186	0.79	0.10	Bacteria	Herbivores
51	Pastor V.	2013	Col-0	BABA	Plectosphaerella cucu- merina	3	15	15	3.274	5.226	0.2645	0.297	-6.75	0.89	Chemical	Fungi
52	Pineda A.	2012	Col-0	Pseudomonas fluorescens WCS417r	B. brassicae	NA	23	23	0.758	0.742	0.167854103	0.196629092	0.09	0.08	Bacteria	Herbivores
52	Pineda A.	2012	Col-0	Pseudomonas fluorescens WCS417r	B. brassicae	NA	23	23	502.934	487.34	79.90334901	117.7424597	0.15	0.08	Bacteria	Herbivores
52	Pineda A.	2012	Col-0	Pseudomonas fluorescens WCS417r	M. persicae	Na	23	23	1.063	0.981	0.09591663	0.172649935	0.58	0.09	Bacteria	Herbivores
52	Pineda A.	2012	Col-0	Pseudomonas fluorescens WCS417r	M. persicae	NA	23	23	594.98	500.295	80.28701553	103.9352608	1.00	0.09	Bacteria	Herbivores
53	Po-Wen C.	2013	Col-0	BABA	Pectobacterium carotovorum ssp. carotovorum (Pcc)	NA	3	3	4.006	5.631	0.024	0.084	-21.04	37.33	Chemical	Bacteria
53	Po-Wen C.	2013	Col-0	BABA	Pectobacterium carotovorum ssp. carotovorum (Pcc)	NA	3	3	3.985	5.537	0.183	0.272	-5.36	2.82	Chemical	Bacteria
53	Po-Wen C.	2013	Col-0	BABA	Pectobacterium carotovorum ssp. carotovorum (Pcc)	NA	3	3	4.104	5.039	0.101	0.076	-8.37	6.26	Chemical	Bacteria
54	SchenkS. T.	2014	Col-0	oxo-C14-HSL or	DC3000	NA	3	3	5.888	6.438	0.378	0.309	-1.27	0.56	Chemical	Bacteria
54	Schenk S. T.	2014	Col-0	oxo-C14-HSL or	DC3000	NA	3	3	8.695	9.848	0.33	0.166	-3.53	1.47	Chemical	Bacteria
55	Song G. C.	2015	Col-0	1-Pentanol	DC3000	3	12	12	1.329	4.117	1.782280281	1.143153533	-1.80	0.22	Chemical	Bacteria
55	Song G. C.	2015	Col-0	2-Pentanol	DC3000	3	12	12	2.329	4.117	1.614271353	1.143153533	-1.23	0.19	Chemical	Bacteria
55	Song G. C.	2015	Col-0	3-penthanol	DC3000	NA	12	12	1.325	3.987	0.800207473	1.662768775	-1.97	0.24	Chemical	Bacteria
55	Song G. C.	2015	Col-0	3-penthanol	DC3000	3	12	12	1.408	4.117	1.042694586	1.143153533	-2.39	0.27	Chemical	Bacteria
55	Song G. C.	2015	Col-0	3-penthanol	DC3000	NA	12	12	6.096	8.047	0.336017857	0.239023011	-6.46	1.02	Chemical	Bacteria
57	Van der Ent S.	2009	Col-0	Pseudomonas fluorescens WCS417r	DC3000	NA	20	20	23.628	60.033	1.775	2.2835	-17.45	3.90	Bacteria	Bacteria
57	Van der Ent S.	2009	Col-0	Pseudomonas fluorescens WCS417r	DC3000	NA	20	20	45.562	55.122	3.5565	3.0325	-2.84	0.20	Bacteria	Bacteria
59	Vos I.A.	2013	Col-0	P. Rapae	P.rapae 1 day later grazing for 7 days	NA	30	30	16.46	24.151	6.118060967	6.156401546	-1.24	0.08	Herbivores	Herbivores
60	Wu C. C.	2010	Col-0	BABA	DC3000	NA	3	3	8.049	9.127	0.059	0.045	-16.44	22.94	Chemical	Bacteria
62	Cho S.M.	2011	Col-0	P. chlororaphis O6	Pectobacterium carotovorum subsp. carotovorum	3	3	3	16.263	82.652	8.911401405	9.234428881	-5.85	3.28	Bacteria	Bacteria
63	Chaturvedi R.	2012	Col-0	Dehydroabietinal	P. syringae pv. maculicola ES4326 (Pma)	NA	5	5	95060.47937	5105050	55654.5042	9309306.058	-0.69	0.35	Chemical	Bacteria
63	Chaturvedi R.	2012	Col-0	Dehydroabietinal	DC3000	NA	5	5	519995.9965	3863669.771	572994.9239	4022067.167	-1.05	0.38	Chemical	Bacteria
63	Chaturvedi R.	2012	Col-0	Dehydroabietinal	P. syringae pv. maculicola ES4326 (Pma)	NA	5	5	239331.5756	7413102.413	141676.7465	4827309.191	-1.90	0.51	Chemical	Bacteria
63	Chaturvedi R.	2012	Col-0	Dehydroabietinal	P. syringae pv. maculicola ES4326 (Pma)	NA	5	5	177010.8958	4560369.16	114091.5927	2699594.749	-2.07	0.54	Chemical	Bacteria
63	Chaturvedi R.	2012	Col-0	Dehydroabietinal	P. syringae pv. maculicola ES4326 (Pma)	NA	5	5	741310.2413	15205475.3	512506.1675	7925675.372	-2.33	0.60	Chemical	Bacteria
63	Chaturvedi R.	2012	Col-0	Dehydroabietinal	P. syringae pv. maculicola ES4326 (Pma)	NA	5	5	197696.964	2999162.519	228569.2764	1356452.302	-2.60	0.66	Chemical	Bacteria
63	Chaturvedi R.	2012	Col-0	Dehydroabietinal	P. syringae pv. maculicola ES4326 (Pma)	NA	5	5	452897.5799	6151768.727	548585.3442	2706318.1	-2.64	0.67	Chemical	Bacteria
63	Chaturvedi R.	2012	Col-0	Dehydroabietinal	P. syringae pv. maculicola ES4326 (Pma)	NA	5	5	420726.6284	9141132.415	406590.854	4021414.517	-2.76	0.71	Chemical	Bacteria
63	Chaturvedi R.	2012	Col-0	Dehydroabietinal	P. syringae pv. maculicola ES4326 (Pma)	NA	5	5	263633.1386	3427677.865	161230.5089	1155812.706	-3.46	0.93	Chemical	Bacteria
63	Chaturvedi R.	2012	Col-0	Dehydroabietinal	P. syringae pv. maculicola ES4326 (Pma)	NA	5	5	97050.99672	3026913.428	166239.8792	618903.3267	-5.84	2.03	Chemical	Bacteria
64	Zhang S	2009	Col-0	Riboflavin	DC3000	NA	3	3	5.294	8.263	0.172	0.2725	-10.42	9.48	Vitamin	Bacteria
64	Zhang S	2009	Col-0	Riboflavin	DC3000	NA	3	3	5.484	8.295	0.302	0.35	-6.88	4.37	Vitamin	Bacteria
64	Zhang S	2009	Col-0	Riboflavin	DC3000	NA	3	3	4.173	8.756	0.295	0.4945	-9.00	7.18	Vitamin	Bacteria
104	Pastor V.	2014	Col-0	BABA	DC3000	2	20	20	17.945	57.694	2.98	7.859	-6.56	0.63	Chemical	Bacteria
125	De Vos M.	2006	Col-0	P.rapae	x.campestris	NA	20	20					-1.725	0.10696012	Herbivores	Bacteria
126	De Vos M.	2006	Col-0	P.rapae	DC3000	NA	20	20					-0.835	0.08238613	Herbivores	Bacteria
127	De Vos M.	2006	Col-0	P.rapae	DC3000	NA	20	20					-1.115	0.08958040	Herbivores	Bacteria
128	Hossain M.M.	2008	Col-0	Penicillium sp. GP16-2	DC3000	2	3	3					-4.400	1.72405456	Fungi	Bacteria
129	Hossain M.M.	2008	Col-0	BTH	DC3000	2	3	3					-4.595	1.73884721	Chemical	Bacteria
130	Hossain M.M.	2008	Col-0	(CT) cell free filtrate of GP16-2	DC3000	2	3	3					-7.520	3.87703147	Fungi	Bacteria
131	Hossain M.M.	2008	Col-0	BTH	DC3000	2	3	3					-6.330	2.87008561	Chemical	Bacteria
132	Hossain M.M.	2008	Col-0	Penicillium sp. GP16-2	DC3000	2	3	3					-3.700	1.18274031	Fungi	Bacteria
133	Hossain M.M.	2008	Col-0	BTH	DC3000	2	3	3					-3.760	1.20331168	Chemical	Bacteria
134	Hossain M.M.	2008	Col-0	(CT) cell free filtrate of GP16-2	DC3000	2	3	3					-10.390	7.31100325	Fungi	Bacteria
135	Hossain M.M.	2008	Col-0	BTH	DC3000	2	3	3					-8.945	5.67046351	Chemical	Bacteria
137	Van Oosten V. R.	2008	Col-0	Pseudomonas fluorescens WCS417r	P. Rapae	2	21	24					0.155	0.06750000	Bacteria	Herbivores
138	Van Oosten V. R.	2008	Col-0	Pseudomonas fluorescens WCS417r	S. Exigua	2	19	17					-0.785	0.08622281	Bacteria	Herbivores
142	Raacke I. C.	2006	Col-0	Yeast	Botrytis cinerea	6	24	24					-3.020	0.13580127	Fungi	Fungi
143	Raacke I. C.	2006	Col-0	Yeast	Botrytis cinerea	3	24	24					-3.005	0.13580127	Fungi	Fungi
144	Sultana F.	2009	Col-0	Phoma sp. GS8-3	DC3000	2	3	3					-4.655	1.74096610	Fungi	Bacteria
145	Sultana F.	2009	Col-0	BTH	DC3000	2	3	3					-3.920	1.33179485	Chemical	Bacteria
146	Sultana F.	2009	Col-0	Phoma sp. GS8-3	DC3000	2	3	3					-4.235	1.48034933	Fungi	Bacteria
147	Sultana F.	2009	Col-0	BTH	DC3000	2	3	3					-3.490	1.08605613	Chemical	Bacteria
148	Kishimoto K.	2006	Col-0	(E)-2-Hexenal	B. cinerea	NA	200	200					-8.110	0.07291288	Chemical	Fungi
149	Kishimoto K.	2006	Col-0	(Z)-3-Hexanal	B. cinerea	NA	200	200					-3.550	0.01750000	Chemical	Fungi
151	Harun-Or-Rashid M.	2017	Col-0	YC7010	Myzus persicae		8	8	20744	35535	8179811245	6598720482	-1.88	0.33	Bacteria	Herbivores
151	Harun-Or-Rashid M.	2017	Col-0	YC7010	Myzus persicae		8	8	11408	22	201666854	2494672724	-4.41	0.83	Bacteria	Herbivores
152	Zhang C.	2011	Col-0	HrpN	Myzus persicae	NA	20	20	11056	32022	1026	1966	-13.10	2.24	Chemical	Herbivores
152	Zhang C.	2011	Col-0	HrpN	Myzus persicae	NA	20	20	19.6	43.9	3.9	6.3	-4.55	0.35	Chemical	Herbivores
152	Zhang C.	2011	Col-0	HrpN	Myzus persicae	NA	20	20					-4.695	0.2822971	Chemical	Herbivores
154	Beckers G.	2009	Col-0	BTH	DC3000	7	10	10	81096.10579	4036453.93	127352.9825	1704710.692	-3.13	0.43	Chemical	Bacteria
155	Bernsdorff F.	2016	Col-0	psm	psm	NA	7	7	10.76465214	391.7418771	8.28261916	363.5960131	-1.39	0.32	Bacteria	Bacteria
155	Bernsdorff F.	2016	Col-0	psm	psm	NA	7	7	34.91403155	434.5102242	18.52212856	198.4995	-2.65	0.50	Bacteria	Bacteria
155	Bernsdorff F.	2016	Col-0	SA	psm	NA	7	7	8.609937522	69.02398038	1.588530708	43.69686632	-1.83	0.37	Hormone	Bacteria
157	Garcia-Andrade J.	2011	Col-0	BABA	P. cucumerina	NA	50	50	4.715	7.303	1.088944443	1.378858223	-2.07	0.06	Chemical	Fungi
163	Singh V.	2013	Col-0	azelaic acid	Pseudomonas syringae pv. maculicola ES4326	2	4	4	175388.0502	4345102.242	120413.1965	1708306.506	-2.99	0.94	Chemical	Bacteria
163	Singh V.	2013	Col-0	DA	Pseudomonas syringae pv. maculicola ES4326	2	4	4	411149.7211	5176068.32	532911.1552	4440054.464	-1.31	0.49	Chemical	Bacteria
163	Singh V.	2013	Col-0	SA	Pseudomonas syringae pv. maculicola ES4326	2	4	4	1279381.304	6109420.249	1006217.499	1688880.856	-3.02	0.95	Hormone	Bacteria
164	Stahl E.	2016	Col-0	Psm	Psm	NA	7	7	38.01893963	2137.96209	19.69782209	1247.548126	-2.23	0.43	Bacteria	Bacteria
164	Stahl E.	2016	Col-0	Psm	Psm	NA	7	7	93.54056741	2275.097431	48.2177109	836.0054015	-3.45	0.68	Bacteria	Bacteria
164	Stahl E.	2016	Col-0	Psm	Psm	NA	7	7	269.1534804	4008.667176	206.2952817	1222.865631	-3.99	0.82	Bacteria	Bacteria
164	Stahl E.	2016	Col-0	Psm	Psm	NA	7	7	268.5344446	4591.980128	206.0059784	1121.382445	-5.02	1.15	Bacteria	Bacteria
165	Yeh Y-H.	2016	Col-0	BABA	DC3000	3	9	9	4.425	5.53	0.192	0.072	-7.26	1.66	Chemical	Bacteria
165	Yeh Y-H.	2016	Col-0	BABA	Psm ES4326	3	9	9	4.534	5.64	0.1185	0.108	-9.29	2.60	Chemical	Bacteria
166	Ton J.	2004	Col-0	BABA	P. Cucumerina	NA	20	20	2.109	2.911	0.351062672	0.986105978	-1.06	0.11	Chemical	Fungi
166	Ton J.	2004	Col-0	BABA	P. Cucumerina	NA	20	20	2.133	3.289	0.617154762	1.317044039	-1.10	0.11	Chemical	Fungi
166	Ton J.	2004	Col-0	BABA	P. Cucumerina	NA	20	20	1.762	2.218	0.140872283	0.406964372	-1.47	0.12	Chemical	Fungi
166	Ton J.	2004	Col-0	BTH	P. Cucumerina	NA	20	20	2.805	3.289	1.357293262	1.317044039	-0.35	0.10	Chemical	Fungi
166	Ton J.	2004	Col-0	JA	P. Cucumerina	NA	20	20	2.028	3.289	0.44274146	1.317044039	-1.26	0.12	Hormone	Fungi
170	Hilfiker O.	2014	Col-0	Pst	P.brassicae larvae	NA	4	4	41.163	85.058	16.046	37.79	-1.31	0.49	Bacteria	Herbivores
170	Hilfiker O.	2014	Col-0	Pst	P.brassicae larvae	NA	3	3	4.041	10.656	1.134493279	1.196847108	-4.54	2.14	Bacteria	Herbivores
171	Li B.	2015	Col-0	flg22	Pst	3	3	3	4.37	5.907	0.166	0.147	-7.84	5.55	Chemical	Bacteria
172	Scala A.	2013	Col-0	E-2-hexenal	DC3000	3	20	20	7.855	7.102	1.413194962	0.702125345	0.66	0.10	Chemical	Bacteria
172	Scala A.	2013	Col-0	E-2-hexenal	DC3000	3	20	20	8.31	6.692	1.010702726	0.769207384	1.77	0.14	Chemical	Bacteria
174	Wang X.	2009	Col-0	SA	DC3000	NA	3	3	6.115	7.151	0.549	0.63	-1.40	0.59	Hormone	Bacteria
176	Zhang H.	2015	Col-0	SA	DC3000	3	6	6	5.954	7.169	0.347	0.347	-3.23	0.72	Hormone	Bacteria
177	Li F.	2013	Col-0	Ala	DC3000	5	4	4	6.057	6.135	0.109	0.117	-0.60	0.40	Chemical	Bacteria
177	Li F.	2013	Col-0	Asn	DC3000	5	4	4	6.165	6.135	0.118	0.117	0.22	0.38	Chemical	Bacteria
177	Li F.	2013	Col-0	Asp	DC3000	5	4	4	5.515	6.135	0.088	0.117	-5.21	2.07	Chemical	Bacteria
177	Li F.	2013	Col-0	Cys	DC3000	5	4	4	5.378	6.135	0.208	0.117	-3.90	1.33	Chemical	Bacteria
177	Li F.	2013	Col-0	Glu	DC3000	5	4	4	6.115	6.135	0.108	0.117	-0.15	0.38	Chemical	Bacteria
177	Li F.	2013	Col-0	Gly	DC3000	5	4	4	5.626	5.888	0.248	0.422	-0.66	0.41	Chemical	Bacteria
177	Li F.	2013	Col-0	GSH	DC3000	5	4	4	5.201	6.121	0.184	0.12	-5.15	2.04	Chemical	Bacteria
177	Li F.	2013	Col-0	GSSG	DC3000	5	4	4	6.154	6.135	0.138	0.117	0.13	0.38	Chemical	Bacteria
177	Li F.	2013	Col-0	Ser	DC3000	5	4	4	5.584	5.888	0.291	0.422	-0.73	0.41	Chemical	Bacteria
178	Navarova H.	2012	Col-0	BABA	Psm	NA	7	7	71.44963261	296.483139	42.45890381	149.7307479	-1.91	0.38	Chemical	Bacteria
178	Navarova H.	2012	Col-0	Pip	Psm	NA	7	7	22.1819642	476.4309868	15.42698693	307.3397152	-1.95	0.39	Chemical	Bacteria
178	Navarova H.	2012	Col-0	Pip	Psm	NA	7	7	45.6036916	296.483139	19.01778736	149.7307479	-2.20	0.42	Chemical	Bacteria
178	Navarova H.	2012	Col-0	Pip	Psm	NA	7	7	129.1219274	351.5604405	47.61207302	92.2200565	-2.84	0.54	Chemical	Bacteria
178	Navarova H.	2012	Col-0	Psm	Psm	NA	7	7	34.04081897	392.6449354	16.83624586	168.1988741	-2.81	0.53	Bacteria	Bacteria
179	Hossain M. M.	2017	Col-0	BTH	DC3000	NA	3	3					-6.99	3.453985	Chemical	Bacteria
180	Hossain M. M.	2017	Col-0	Penicillium viridicatum GP15-1	DC3000	NA	3	3					-5.63	2.448944	Fungi	Bacteria
53	Po-Wen C.	2013	Col-6	BABA	Pectobacterium carotovorum ssp. carotovorum (Pcc)	NA	3	3	4.037	4.888	0.075	0.16	-5.45	2.90	Chemical	Bacteria
31	Raacke I. C.	2006	Colgl	Yeast	DC3000	3	5	5	6.526	6.958	0.057	0.1075	-4.54	1.35	Fungi	Bacteria
141	Raacke I. C.	2006	Colgl	Yeast	Botrytis cinerea	3	24	24					-2.660	0.12372983	Fungi	Fungi
150	De Vos M.	2006	Di-0	P.rapae	TCV	NA	15	15					-2.110	0.13296250	Herbivores	Virus
165	Yeh Y-H.	2016	Ler	BABA	Psm ES4326	3	9	9	4.953	5.858	0.1185	0.165	-6.00	1.20	Chemical	Bacteria
165	Yeh Y-H.	2016	Ler	BABA	DC3000	3	9	9	4.996	5.938	0.1005	0.126	-7.87	1.92	Chemical	Bacteria
168	Dong H-P.	2005	Ler	HrpN	P. syringae pv. tomato	NA	3	3	3.49	6.684	0.23	0.3525	-8.59	6.57	Chemical	Bacteria
172	Scala A.	2013	Ler	E-2-hexenal	DC3000	3	12	12	9.181	8.09	0.628734443	0.628734443	1.68	0.21	Chemical	Bacteria
27	Mishina T. E.	2007	Ler-0	DC3000 (Pst)	P. syringae pv. Maculicola (Psm)	2	5	5	1.692	7.985	0.726	1.089	-6.14	2.21	Bacteria	Bacteria
27	Mishina T. E.	2007	Ler-0	flg22	P. syringae pv. Maculicola (Psm)	2	5	5	1.097	8.086	0.53	3.413	-2.58	0.66	Chemical	Bacteria
27	Mishina T. E.	2007	Ler-0	flg22	P. syringae pv. Maculicola (Psm)	2	5	5	0.927	13.468	0.564	3.996	-3.97	1.11	Chemical	Bacteria
27	Mishina T. E.	2007	Ler-0	Psg	P. syringae pv. Maculicola (Psm)	2	5	5	2.581	7.985	2.056	1.089	-2.97	0.77	Bacteria	Bacteria
27	Mishina T. E.	2007	Ler-0	Psm	P. syringae pv. Maculicola (Psm)	2	5	5	0.284	8.086	0.285	3.413	-2.91	0.75	Bacteria	Bacteria
63	Chaturvedi R.	2012	N_	Dehydroabietinal	P. syringae pv. maculicola ES4326 (Pma)	NA	5	5	293764.9652	5649369.748	71714.58141	1738559.455	-3.93	1.10	Chemical	Bacteria
63	Chaturvedi R.	2012	N_	Dehydroabietinal	P. syringae pv. maculicola ES4326 (Pma)	NA	5	5	446683.5922	5308844.442	438278.5476	1448473.391	-4.10	1.17	Chemical	Bacteria
38	Aziz M.	2016	NA	Bacillus amyloliquefaciens	Spodoptera exigua	NA	10	10	806.641	1183.813	354.5213673	225.3597175	-1.22	0.22	Bacteria	Herbivores
38	Aziz M.	2016	NA	Bacillus amyloliquefaciens	Spodoptera exigua	NA	11	11	28.094	49.195	13.61142814	7.255116729	-1.86	0.25	Bacteria	Herbivores
31	Raacke I. C.	2006	WS	Yeast	DC3000	3	5	5	4.388	5.058	0.258	0.1285	-2.97	0.77	Fungi	Bacteria
63	Chaturvedi R.	2012	Ws	Dehydroabietinal	P. syringae pv. maculicola ES4326 (Pma)	NA	5	5	128824.9552	665273.1562	67148.49459	106391.8324	-5.45	1.81	Chemical	Bacteria
140	Raacke I. C.	2006	WS	Yeast	Botrytis cinerea	3	24	24					-2.140	0.09711308	Fungi	Fungi
27	Mishina T. E.	2007	Ws-0	flg22	P. syringae pv. Maculicola (Psm)	2	5	5	5.688	7.561	2.967	3.247	-0.54	0.34	Chemical	Bacteria
27	Mishina T. E.	2007	Ws-0	Psm	P. syringae pv. Maculicola (Psm)	2	5	5	0.976	7.561	0.934	3.247	-2.49	0.64	Bacteria	Bacteria
94	Ton J	2005	Ws-0	BABA	DC3000	NA	5	5	5649.369748	73960.52751	1533.94448	13465.28877	-6.44	2.40	Chemical	Bacteria
94	Ton J	2005	Ws-0	BABA	DC3000	NA	20	20	27.943	54.043	2.6415	2.527	-9.90	1.32	Chemical	Bacteria
